# Supplementary material for: A genetically stable Zika virus vaccine candidate protects mice against virus infection and vertical transmission
Source: PubMed Central journal article supplement (PMC7889622; doi:10.1038/s41541-021-00288-6), 2021-02-17
Supplement: 41541_2021_288_MOESM1_ESM.pdf [file 41541_2021_288_MOESM1_ESM.pdf]

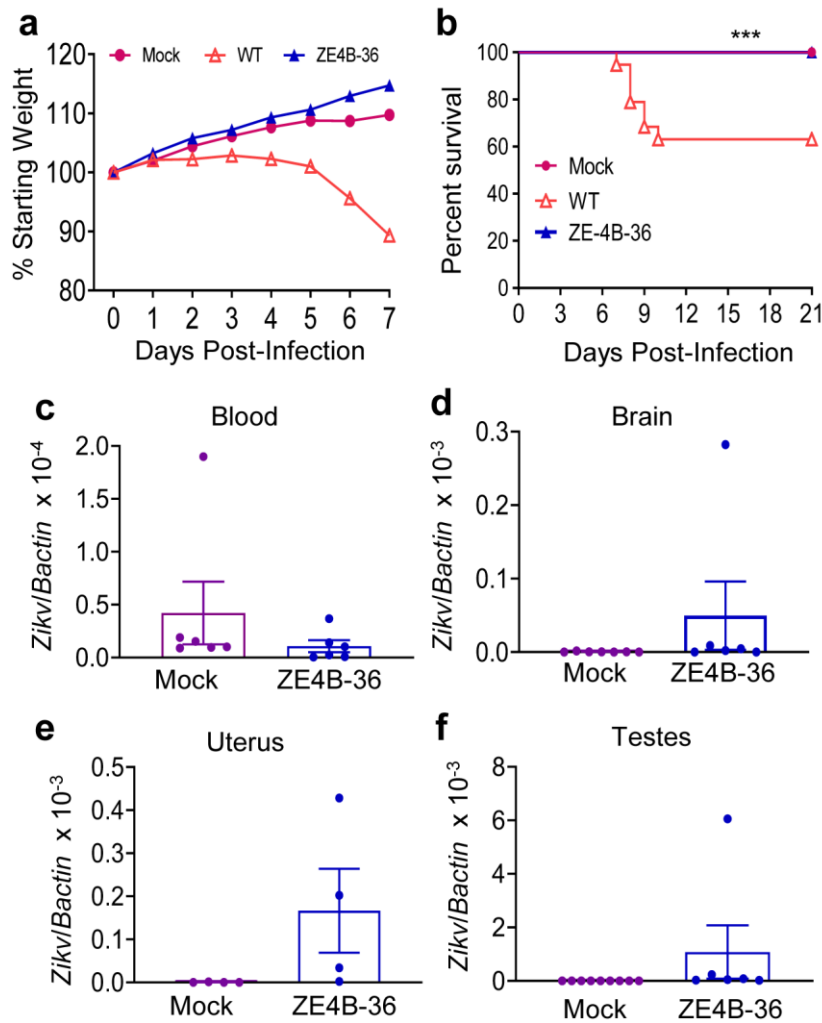

1

2 **Supplementary Figure 1. ZE4B-36 mutant is attenuated and induces a brief infection in mice.**

3 **a-b.** 4- to 6-week old AB6 were infected with  $1 \times 10^4$  FFU WT FSS13025ic (WT, n=19), ZE4B-36  
 4 (n=14) or PBS (mock, n=14). The immunized mice were monitored for weight loss (a), survival (b).

5 Weight loss is indicated by percentage, using the weight on the day before immunization to define  
 6 100%. \*\*\* $P < 0.001$  compared to WT group (log rank test). **c-f.** 4 to 6-week old AB6 mice were

7 infected with  $2.2 \times 10^5$  FFU ZE4B-36 or PBS (mock). Viral loads at day 6 in blood (c), brain (d),  
 8 uterus (e) and testes (f) were determined by Q-PCR assays. n= 6. Data are presented as means  $\pm$

9 standard error of the mean (s.e.m). \*\*\*  $P < 0.001$  compared to mock group (Unpaired t test).

10

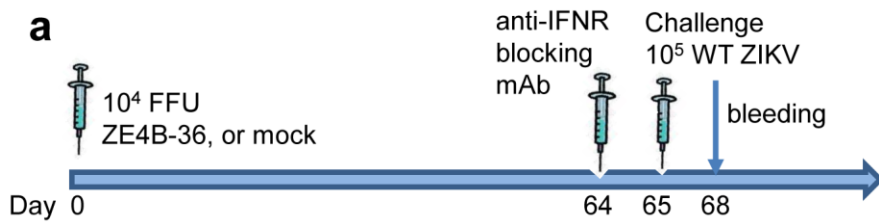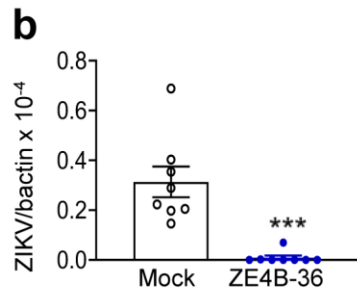

11

12 **Supplementary Figure 2. Vaccination with ZE4B-36 protects WT B6 mice from ZIKV**

13 **infection.** 4- to 6-week old WT B6 mice were infected with ZE4B-36 or PBS (mock) subcutaneously.

14 On day 64 pi, mice were pretreated with mouse MAR1-5A3 followed by infection with 1x 10<sup>5</sup> FFU

15 ZIKV-Dakar-MA strain one day later. **a.** Schematic of vaccination and challenge. **b.** Viremia was

16 determined by using Q-PCR at day 3 pi (n=8). Data are presented as means ± standard error of the

17 mean (s.e.m). \*\*\* P < 0.001 compared to mock group (Unpaired t test).

18

19

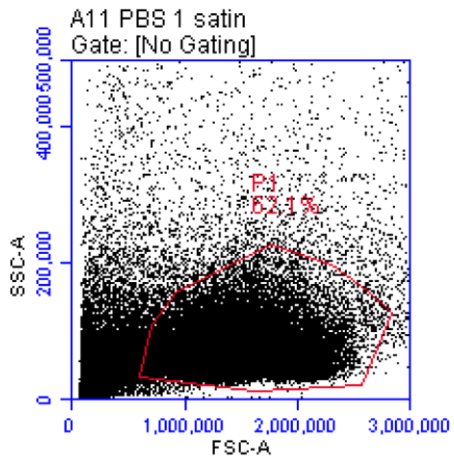

20

21 **Gating Strategy:** Samples were processed with a C6 Flow Cytometer instrument. Total splenocytes  
22 were gated. Dead cells were excluded on the basis of forward and side light scatter.

23
